# Supplementary material for: Fine-tuning of radiative properties by “mild” substituents: searching for a perfectly soft chromophore
Source: Royal Society of Chemistry journal article supplement (doi:10.1039/d4cp01502a), 2024-01-01
Supplement: d4cp01502a1.pdf [file d4cp01502a1.pdf]

# Fine-tuning of radiative properties by “mild” substituents: In search for a perfectly soft chromophore

Grażyna Orzanowska,<sup>1</sup> Claudia Ryppa,<sup>2</sup> Mathias O. Senge,<sup>2</sup> Jacek Waluk<sup>1,3</sup>

<sup>1</sup> *Institute of Physical Chemistry, Polish Academy of Sciences, Kasprzaka 44/52, 01-224 Warsaw, Poland*

<sup>2</sup> *School of Chemistry, Chair of Organic Chemistry, Trinity Biomedical Sciences Institute, Trinity College Dublin, The University of Dublin, 52–160 Pearse Street, Dublin D02R590, Ireland*

<sup>3</sup> *Faculty of Mathematics and Science, Cardinal Stefan Wyszyński University, Dewajtis 5, 01-815 Warsaw, Poland*

## Supporting Information

|                                                                                            |    |
|--------------------------------------------------------------------------------------------|----|
| 1. Computational details.....                                                              | 2  |
| 2. Optimized molecular geometries.....                                                     | 4  |
| 3. Calculated orbital energies and splittings.....                                         | 17 |
| 4. Comparison of main configurations calculated for the $S_1 \leftarrow S_0$ transition... | 18 |
| 5. Rates of radiative and nonradiative $S_1$ depopulation.....                             | 18 |
| 6. Figures.....                                                                            | 19 |

## 1. Computational details

Three approaches were used to optimize the geometry and calculate electronic transitions: (a) B3LYP/6-31G(d,p) (as implemented in Gaussian 16<sup>1</sup>); (b) BP86-D/DZP, using version 2023.101 of the ADF package;<sup>2</sup> (c) an INDO/S program, modified to include calculations of MCD parameters. This was an extended version of a program originally created by John Downing and Josef Michl.

Ground state geometry optimizations were done using each of the above methods for each molecule. To ensure whether real minimum was achieved, we checked whether all calculated vibrations had positive values. The optimized geometries served as input for calculations of transition energies. For INDO/S, we found that the best agreement between experiment and calculations was obtained when using B3LYP-optimized structures.

Simulated MCD spectra were obtained using a procedure described in the literature.<sup>3</sup>

For both absorption and MCD simulations (Figures S2-S7), a bandwidth of 1000 cm<sup>-1</sup> was assumed.

Calculations of FC and HT contributions (B3LYP/6-31G(d,p)) were performed with Gaussian 16 using the procedure described in detail in ref. <sup>4</sup> In this case, geometry optimizations were also performed for S<sub>1</sub>, the lowest excited state. Files containing the normal modes parameters for S<sub>0</sub> and S<sub>1</sub> states were used in input. The simulated vibronic spectra (Figures S8-S13) were plotted assuming a gaussian band of 135 cm<sup>-1</sup> FWHM. This value is lower than that used for electronic absorption and MCD calculated for standard calculations. We decided to use the smaller value in order to make visible the vibronic bands which would be blurred when using 135 cm<sup>-1</sup> FWHM.

1. M. Frisch, G. Trucks, H. Schlegel, G. Scuseria, M. Robb, J. Cheeseman, G. Scalmani, V. Barone, G. Petersson, H. Nakatsuji, X. Li, M. Caricato, A. Marenich, J. Bloino, B. Janesko, R. Gomperts, B. Menucci, H. Hratchian, J. Ortiz, A. Izmaylov, J. Sonnenberg, D. Williams-Young, F. Ding, F. Lipparini, F. Egidi, J. Goings, B. Peng, A. Petrone, T. Henderson, D. Ranasinghe, V. G. Zakrzewski, J. Gao, N. Rega, G. Zheng, W. Liang, M. Hada, M. Ehara, K. Toyota, R. Fukuda, J. Hasegawa, M. Ishida, T. Nakajima, Y. Honda, O. Kitao, H. Nakai, T. Vreven, K. Throssell, J. A. J. Montgomery, J. Peralta, F. Ogliaro, M. Bearpark, J. J. Heyd, E. Brothers, K. N. Kudin, V. N. Staroverov, T. Keith, R. Kobayashi, J. Normand, K. Raghavachari, A. Rendell, J. C. Burant, S. S. Iyengar, J. Tomasi, M. Cossi, J. M. Millam, M. Klene, C. Adamo, R. Cammi, J. W. Ochterski, R. L. Martin, K. Morokuma, O. Farkas, J. Foresman and D. Fox, *Gaussian 16, Revision B.01*, Gaussian, Inc., Wallingford CT 2016.

2. te Velde, G.; Bickelhaupt, F. M.; Baerends, E. J.; Fonseca Guerra, C.; van Gisbergen, S. J. A.; Snijders, J. G.; Ziegler, T., *Chemistry with ADF*. J. Comput. Chem. 2001, 22, 931–967.

3. M. Seth, M. Krykunov, T. Ziegler, J. Autschbach and A. Banerjee, *Application of magnetically perturbed time-dependent density functional theory to magnetic circular dichroism: Calculation of B terms*. J. Chem. Phys., 2008, 128, 144105.
4. F. Santoro, A. Lami, R. R. Improta, J. Bloino and V. Barone, *Effective method for the computation of optical spectra of large molecules at finite temperature including the Duschinsky and Herzberg-Teller effect: The  $Q_x$  band of porphyrin as a case study*. J. Chem. Phys., 2008, 128, 224311.

## 2. Optimized molecular geometries

### 2.1 Coordinates of B3LYP/6-31G(d,p) optimized ground state molecular geometry of Pr

|   |              |              |              |
|---|--------------|--------------|--------------|
| 6 | -1.081239144 | 2.854890668  | -0.000108105 |
| 7 | 0.002493650  | 2.027469238  | -0.000711105 |
| 6 | 1.088223014  | 2.852257921  | -0.000059105 |
| 6 | 0.683258466  | 4.255209162  | -0.000094105 |
| 6 | -0.672869632 | 4.256854633  | -0.000278105 |
| 6 | -4.261836588 | -0.680750489 | 0.000314895  |
| 6 | -4.260131119 | 0.691125612  | 0.000276895  |
| 6 | -2.895095867 | 1.133138171  | 0.000124895  |
| 7 | -2.117509202 | 0.002533823  | -0.000029105 |
| 6 | -2.897897644 | -1.126138992 | 0.000185895  |
| 6 | 2.897895548  | 1.126138177  | 0.000031895  |
| 7 | 2.117506101  | -0.002536637 | -0.000393105 |
| 6 | 2.895093767  | -1.133138986 | -0.000068105 |
| 6 | 4.260134019  | -0.691123426 | 0.000468895  |
| 6 | 4.261838493  | 0.680748673  | 0.000508895  |
| 6 | 2.419184283  | -2.443018918 | 0.000048895  |
| 6 | 1.081230042  | -2.854877486 | -0.000139105 |
| 7 | -0.002495748 | -2.027467052 | -0.000765105 |
| 6 | -1.088229110 | -2.852270738 | 0.000019895  |
| 6 | -0.683251565 | -4.255210977 | -0.000305105 |
| 6 | 0.672878532  | -4.256847447 | -0.000047105 |
| 6 | -2.419182383 | 2.443027104  | 0.000210895  |
| 6 | -2.425178062 | -2.437185247 | 0.000340895  |
| 6 | 2.425174966  | 2.437175431  | 0.000202895  |
| 1 | -1.103111130 | 0.001252473  | 0.000279895  |
| 1 | 1.103105028  | -0.001254288 | -0.000560105 |
| 1 | 1.357363806  | 5.102278991  | 0.000086895  |
| 1 | -1.344900385 | 5.105569923  | -0.000216105 |
| 1 | -5.118610877 | -1.340463239 | 0.000303895  |
| 1 | -5.115261952 | 1.352966952  | 0.000235895  |
| 1 | 5.115265853  | -1.352959765 | 0.000817895  |
| 1 | 5.118609782  | 1.340461424  | 0.000857895  |
| 1 | 3.174724069  | -3.222689235 | 0.000244895  |
| 1 | -1.357335908 | -5.102299809 | -0.000244105 |
| 1 | 1.344927289  | -5.105556736 | 0.000143895  |
| 1 | -3.174733166 | 3.222685419  | 0.000417895  |
| 1 | -3.182605386 | -3.215018043 | 0.000617895  |
| 1 | 3.182599290  | 3.215013228  | 0.000480895  |

## 2.2 Coordinates of B3LYP/6-31G(d,p) optimized ground state molecular geometry of **Pr-1**

|   |              |              |              |
|---|--------------|--------------|--------------|
| 6 | -0.980200633 | -1.202720476 | -0.764634936 |
| 7 | 0.343639363  | -1.363238023 | -0.456766043 |
| 6 | 0.549267151  | -2.708929956 | -0.398183009 |
| 6 | -0.680758019 | -3.438344564 | -0.673340642 |
| 6 | -1.634503885 | -2.503526426 | -0.904789398 |
| 6 | -0.585048688 | 3.512821975  | -0.635810582 |
| 6 | -1.573574020 | 2.594422112  | -0.878807335 |
| 6 | -1.002975808 | 1.281242828  | -0.763032719 |
| 7 | 0.325225608  | 1.466044721  | -0.451423551 |
| 6 | 0.627980542  | 2.801507648  | -0.365441963 |
| 6 | 3.002357164  | -2.810844346 | 0.156239518  |
| 7 | 3.297272572  | -1.473040614 | 0.218357971  |
| 6 | 4.622543719  | -1.279722131 | 0.517008210  |
| 6 | 5.209141214  | -2.581685551 | 0.651575978  |
| 6 | 4.224683038  | -3.511601312 | 0.433194764  |
| 6 | 5.228965421  | -0.032961027 | 0.655256359  |
| 6 | 4.592877519  | 1.206386393  | 0.517538601  |
| 7 | 3.272958782  | 1.377324732  | 0.221428446  |
| 6 | 3.079805943  | 2.725164982  | 0.189334832  |
| 6 | 4.321225908  | 3.441038891  | 0.474760735  |
| 6 | 5.267171638  | 2.491177255  | 0.679047379  |
| 6 | -1.639182352 | 0.037149132  | -0.923091851 |
| 6 | 1.869530906  | 3.370000258  | -0.077030725 |
| 6 | 1.756351323  | -3.364738924 | -0.121107751 |
| 1 | 0.968227405  | 0.692747260  | -0.310885968 |
| 1 | 2.647559694  | -0.706726805 | 0.071884604  |
| 1 | -0.781806230 | -4.516148998 | -0.686070027 |
| 1 | -2.674392425 | -2.677931605 | -1.140702363 |
| 1 | -0.670957392 | 4.590725498  | -0.641272135 |
| 1 | -2.605905009 | 2.806872093  | -1.112144709 |
| 1 | 6.249126789  | -2.762344796 | 0.886005183  |
| 1 | 4.316369828  | -4.588817777 | 0.456887983  |
| 1 | 6.287745986  | -0.031402274 | 0.893878472  |
| 1 | 4.430263208  | 4.517596827  | 0.508401464  |
| 1 | 6.315061163  | 2.624542526  | 0.915797216  |
| 1 | 1.884901288  | 4.455739367  | -0.060847262 |
| 1 | 1.721489930  | -4.450137676 | -0.121519313 |
| 6 | -3.127157681 | 0.046276817  | -1.231461055 |
| 6 | -4.019718338 | 0.007248803  | 0.026671550  |
| 1 | -3.374780989 | -0.803654921 | -1.873864418 |
| 1 | -3.378256313 | 0.933983207  | -1.819974071 |
| 6 | -5.517509133 | 0.018689521  | -0.300707336 |

|   |              |              |              |
|---|--------------|--------------|--------------|
| 1 | -3.774360438 | -0.888474604 | 0.611289974  |
| 1 | -3.773305269 | 0.864182257  | 0.666995748  |
| 6 | -6.413485327 | -0.022040150 | 0.943215355  |
| 1 | -5.755385313 | 0.915984995  | -0.890231150 |
| 1 | -5.755478554 | -0.838057401 | -0.947603616 |
| 1 | -6.176152718 | -0.919328628 | 1.532282070  |
| 1 | -6.176279191 | 0.834650224  | 1.590049308  |
| 6 | -7.912752267 | -0.011501083 | 0.620200096  |
| 6 | -8.800343595 | -0.052892573 | 1.867621645  |
| 1 | -8.149220783 | -0.867783610 | -0.026073865 |
| 1 | -8.149532151 | 0.885540306  | 0.031890250  |
| 1 | -9.862919287 | -0.044267287 | 1.603986667  |
| 1 | -8.611824729 | -0.956505287 | 2.458380738  |
| 1 | -8.612013328 | 0.809672830  | 2.516927168  |

### 2.3 Coordinates of B3LYP/6-31G(d,p) optimized ground state molecular geometry of **Pr-2a**

|   |              |              |              |
|---|--------------|--------------|--------------|
| 6 | 2.789640203  | -1.203233084 | 0.795411059  |
| 7 | 1.479876107  | -1.341940099 | 0.426229030  |
| 6 | 1.252620091  | -2.682489192 | 0.359743026  |
| 6 | 2.456126178  | -3.432727247 | 0.695055049  |
| 6 | 3.414732246  | -2.513984180 | 0.968373072  |
| 6 | 2.368455171  | 3.492935251  | 0.649065048  |
| 6 | 3.360209241  | 2.591389185  | 0.937046069  |
| 6 | 2.815400202  | 1.270159089  | 0.794233058  |
| 7 | 1.500762109  | 1.432264104  | 0.421248031  |
| 6 | 1.180219087  | 2.761745201  | 0.320753023  |
| 6 | -1.180283085 | -2.761458196 | -0.321168023 |
| 7 | -1.500834109 | -1.431971104 | -0.421582030 |
| 6 | -2.815488204 | -1.269854092 | -0.794478056 |
| 6 | -3.360312240 | -2.591071187 | -0.937303070 |
| 6 | -2.368534172 | -3.492635250 | -0.649445045 |
| 6 | -3.451362250 | -0.030372002 | -0.982879069 |
| 6 | -2.789743202 | 1.203534086  | -0.795761057 |
| 7 | -1.479956108 | 1.342232099  | -0.426645030 |
| 6 | -1.252675089 | 2.682771190  | -0.360194026 |
| 6 | -2.456170179 | 3.433023247  | -0.695514052 |
| 6 | -3.414845247 | 2.514294183  | -0.968622071 |
| 6 | 3.451251250  | 0.030673002  | 0.982632070  |
| 6 | -0.050832004 | 3.315705239  | -0.025962002 |
| 6 | 0.050790004  | -3.315423240 | 0.025477002  |
| 1 | 0.892608066  | 0.633927044  | 0.255132019  |
| 1 | -0.892653062 | -0.633645045 | -0.255518018 |
| 1 | 2.537296184  | -4.512139327 | 0.715195054  |
| 1 | 4.439458319  | -2.704111194 | 1.254106090  |
| 1 | 2.435351177  | 4.572218328  | 0.659118045  |
| 1 | 4.377095314  | 2.819348203  | 1.219217090  |
| 1 | -4.377217316 | -2.819000205 | -1.219427088 |
| 1 | -2.435427177 | -4.571918327 | -0.659544049 |
| 1 | -2.537310181 | 4.512435322  | -0.715721051 |
| 1 | -4.439599318 | 2.704459197  | -1.254227091 |
| 1 | -0.070711005 | 4.401669316  | -0.034893003 |
| 1 | 0.070686005  | -4.401388318 | 0.034343002  |
| 6 | 4.924551356  | 0.038336003  | 1.349280100  |
| 6 | 5.863012398  | 0.002985000  | 0.124663009  |
| 1 | 5.148413373  | -0.814233058 | 1.997269145  |
| 1 | 5.153270373  | 0.925195066  | 1.948720138  |
| 6 | 7.348415529  | 0.019431001  | 0.504178036  |
| 1 | 5.641376403  | -0.893219065 | -0.468668034 |

|   |               |              |              |
|---|---------------|--------------|--------------|
| 1 | 5.636438385   | 0.859405062  | -0.523561038 |
| 6 | 8.285261617   | -0.017328001 | -0.709552050 |
| 1 | 7.562992564   | 0.917433067  | 1.101465081  |
| 1 | 7.567670544   | -0.836818062 | 1.158227083  |
| 1 | 8.071553597   | -0.916179065 | -1.305179092 |
| 1 | 8.064260582   | 0.837699058  | -1.364204099 |
| 6 | 9.773426683   | 0.001345000  | -0.338926024 |
| 6 | 10.699329756  | -0.035496003 | -1.558527113 |
| 1 | 9.994276744   | -0.853610063 | 0.314564023  |
| 1 | 9.986853710   | 0.899758066  | 0.256155018  |
| 1 | 11.753342831  | -0.020889001 | -1.262708093 |
| 1 | 10.533489734  | -0.940425067 | -2.153972155 |
| 1 | 10.525674738  | 0.825772059  | -2.213538161 |
| 6 | -4.924707352  | -0.038118003 | -1.349337097 |
| 6 | -5.862968423  | -0.003587000 | -0.124538009 |
| 1 | -5.153334372  | -0.924680065 | -1.949256142 |
| 1 | -5.148843371  | 0.814782058  | -1.996780143 |
| 6 | -7.348448550  | -0.019705001 | -0.503768036 |
| 1 | -5.636323395  | -0.860438063 | 0.523085038  |
| 1 | -5.641175421  | 0.892220063  | 0.469335034  |
| 6 | -8.285012586  | 0.016277001  | 0.710206050  |
| 1 | -7.567805537  | 0.837002062  | -1.157178085 |
| 1 | -7.563199525  | -0.917291068 | -1.101617077 |
| 1 | -8.063838563  | -0.839167059 | 1.364255096  |
| 1 | -8.071167562  | 0.914749064  | 1.306356093  |
| 6 | -9.773271687  | -0.002193000 | 0.339944025  |
| 6 | -10.698862757 | 0.035119003  | 1.559769114  |
| 1 | -9.987016697  | -0.900719067 | -0.254851019 |
| 1 | -9.994120742  | 0.852636059  | -0.313710023 |
| 1 | -11.752951822 | 0.020579001  | 1.264220090  |
| 1 | -10.525166781 | -0.825993059 | 2.214975158  |
| 1 | -10.532738778 | 0.940189070  | 2.154918155  |



## 2.4 Coordinates of B3LYP/6-31G(d,p) optimized ground state molecular geometry of **Pr-2b**

|   |              |              |              |
|---|--------------|--------------|--------------|
| 6 | 2.905148208  | 1.098133080  | -0.553385039 |
| 7 | 2.112906154  | 2.166282157  | -0.197972014 |
| 6 | 2.879086208  | 3.243221233  | 0.172078012  |
| 6 | 4.245388304  | 2.837908206  | 0.046631003  |
| 6 | 4.264037309  | 1.540392108  | -0.393544028 |
| 6 | -0.676845049 | -1.879062135 | -1.486446108 |
| 6 | 0.676681047  | -1.879117137 | -1.486459109 |
| 6 | 1.093559078  | -0.540416037 | -1.083159078 |
| 7 | 0.000012000  | 0.247183018  | -0.840780060 |
| 6 | -1.093606080 | -0.540320039 | -1.083168080 |
| 6 | 1.083025080  | 4.890421350  | 0.721658054  |
| 7 | 0.000176000  | 4.108813297  | 0.455006033  |
| 6 | -1.082606077 | 4.890481353  | 0.721758053  |
| 6 | -0.677538049 | 6.219539431  | 1.173451084  |
| 6 | 0.678072047  | 6.219506463  | 1.173377084  |
| 6 | -2.413466173 | 4.489486323  | 0.590606044  |
| 6 | -2.878809205 | 3.243400232  | 0.172279012  |
| 7 | -2.112721153 | 2.166422156  | -0.197853014 |
| 6 | -2.905054211 | 1.098351080  | -0.553294042 |
| 6 | -4.263904306 | 1.540699111  | -0.393374029 |
| 6 | -4.245144306 | 2.838184204  | 0.046893003  |
| 6 | 2.453815176  | -0.163898012 | -0.972780070 |
| 6 | -2.453826178 | -0.163694012 | -0.972764068 |
| 6 | 2.413852176  | 4.489347324  | 0.590401041  |
| 1 | 5.092962365  | 3.471455248  | 0.269022019  |
| 1 | 5.141001372  | 0.941001066  | -0.584299039 |
| 1 | -1.322045093 | -2.710110196 | -1.730392126 |
| 1 | 1.321805095  | -2.710220196 | -1.730413123 |
| 1 | -1.351317099 | 7.021559517  | 1.446930103  |
| 1 | 1.351921096  | 7.021492523  | 1.446783103  |
| 1 | -5.140919371 | 0.941380068  | -0.584124041 |
| 1 | -5.092663364 | 3.471775252  | 0.269368020  |
| 6 | 3.521002251  | -1.207620086 | -1.271223090 |
| 6 | 3.896118281  | -2.072619149 | -0.050127004 |
| 1 | 4.421949320  | -0.717794050 | -1.651273120 |
| 1 | 3.186757232  | -1.857116133 | -2.084703149 |
| 6 | 4.978426358  | -3.113926223 | -0.358481026 |
| 1 | 4.234550304  | -1.415547104 | 0.761591055  |
| 1 | 2.994484213  | -2.574767183 | 0.323001023  |
| 6 | 5.351152369  | -3.979175285 | 0.851431059  |
| 1 | 4.637230335  | -3.763313270 | -1.177727085 |
| 1 | 5.879031440  | -2.605824188 | -0.732630052 |

|   |              |              |              |
|---|--------------|--------------|--------------|
| 1 | 5.691829432  | -3.330099241 | 1.670773122  |
| 1 | 4.450693318  | -4.487590323 | 1.224446086  |
| 6 | 6.433421445  | -5.023386363 | 0.550871040  |
| 6 | 6.798149508  | -5.883256444 | 1.764606128  |
| 1 | 7.333366522  | -4.514900325 | 0.178881013  |
| 1 | 6.092803438  | -5.672023386 | -0.267803019 |
| 1 | 7.569461544  | -6.619555468 | 1.516497110  |
| 1 | 7.179039491  | -5.267309377 | 2.587157186  |
| 1 | 5.925316404  | -6.429598457 | 2.139731154  |
| 6 | -3.521096254 | -1.207322085 | -1.271249094 |
| 6 | -3.896265281 | -2.072353147 | -0.050194004 |
| 1 | -3.186889230 | -1.856806135 | -2.084754152 |
| 1 | -4.422004317 | -0.717414053 | -1.651284117 |
| 6 | -4.978729359 | -3.113496224 | -0.358559026 |
| 1 | -2.994679215 | -2.574649187 | 0.322850023  |
| 1 | -4.234563306 | -1.415292104 | 0.761589055  |
| 6 | -5.351346365 | -3.978922286 | 0.851260061  |
| 1 | -5.879344448 | -2.605239188 | -0.732470050 |
| 1 | -4.637730334 | -3.762771271 | -1.177977084 |
| 1 | -4.450853320 | -4.487409323 | 1.224096088  |
| 1 | -5.691925425 | -3.329972238 | 1.670743118  |
| 6 | -6.433646451 | -5.023085361 | 0.550644038  |
| 6 | -6.798980475 | -5.882473421 | 1.764537129  |
| 1 | -6.092778461 | -5.672064397 | -0.267655019 |
| 1 | -7.333370544 | -4.514613326 | 0.178100013  |
| 1 | -7.570183554 | -6.618858488 | 1.516339108  |
| 1 | -5.926341421 | -6.428685467 | 2.140302152  |
| 1 | -7.180261520 | -5.266198380 | 2.586660188  |
| 1 | 3.178971230  | 5.217358373  | 0.841846061  |
| 1 | -3.178523228 | 5.217534378  | 0.842134061  |
| 1 | 1.098753080  | 2.155818153  | -0.207924015 |
| 1 | -1.098569080 | 2.155890153  | -0.207866015 |

## 2.4 Coordinates of B3LYP/6-31G(d,p) optimized ground state molecular geometry of **Pr-3**

|   |              |              |              |
|---|--------------|--------------|--------------|
| 6 | -2.608597188 | -2.686868192 | -0.619897047 |
| 7 | -1.291334095 | -2.723251197 | -0.256675018 |
| 6 | -1.035632077 | -4.020790287 | 0.066382005  |
| 6 | -2.224009161 | -4.847729351 | -0.094297007 |
| 6 | -3.207224231 | -4.019153288 | -0.520763038 |
| 6 | -2.412364172 | 1.959621142  | -1.505194106 |
| 6 | -3.347542241 | 0.960425067  | -1.532666110 |
| 6 | -2.714305196 | -0.257677019 | -1.124770079 |
| 7 | -1.402651102 | 0.063845004  | -0.850767063 |
| 6 | -1.162833084 | 1.402473102  | -1.071576076 |
| 6 | 1.380064097  | -3.869808276 | 0.736446055  |
| 7 | 1.617583114  | -2.530108184 | 0.563133040  |
| 6 | 2.909430210  | -2.212589161 | 0.913450067  |
| 6 | 3.527255253  | -3.441500249 | 1.329761095  |
| 6 | 2.600224186  | -4.444208319 | 1.217978090  |
| 6 | 3.473360249  | -0.929485069 | 0.857038063  |
| 6 | 2.782073201  | 0.213909016  | 0.392412028  |
| 7 | 1.484893105  | 0.259602018  | -0.042503003 |
| 6 | 1.255463091  | 1.557444110  | -0.409632030 |
| 6 | 2.456300177  | 2.363264170  | -0.202156014 |
| 6 | 3.397802247  | 1.532537113  | 0.302718022  |
| 6 | -3.304055237 | -1.532670111 | -1.032343076 |
| 6 | 0.047351003  | 2.101476153  | -0.901586066 |
| 6 | 0.183212013  | -4.542674325 | 0.508770036  |
| 1 | -0.721061052 | -0.619220044 | -0.536892039 |
| 1 | 0.949460070  | -1.841412131 | 0.231844017  |
| 1 | -2.279635162 | -5.911536417 | 0.098848007  |
| 1 | -4.231576307 | -4.282411307 | -0.741690054 |
| 1 | -2.581518188 | 2.995445215  | -1.754772126 |
| 1 | -4.385422315 | 1.063398076  | -1.809619130 |
| 1 | 4.548743327  | -3.543553256 | 1.663370118  |
| 1 | 2.730799196  | -5.492652407 | 1.448202103  |
| 1 | 2.569002183  | 3.419041247  | -0.398802029 |
| 1 | 4.410201315  | 1.792020129  | 0.576059041  |
| 1 | 0.205161015  | -5.608299385 | 0.716302050  |
| 6 | -4.786514344 | -1.644742121 | -1.350184098 |
| 6 | -5.695328405 | -1.460205107 | -0.117192008 |
| 1 | -4.991444361 | -2.618490188 | -1.804164128 |
| 1 | -5.063407366 | -0.910690063 | -2.112594151 |
| 6 | -7.188299511 | -1.575009111 | -0.446813032 |
| 1 | -5.424164383 | -2.207250160 | 0.639688049  |
| 1 | -5.489810408 | -0.481485035 | 0.335665024  |

|   |               |              |              |
|---|---------------|--------------|--------------|
| 6 | -8.096381588  | -1.405440099 | 0.777163054  |
| 1 | -7.454379516  | -0.823012061 | -1.203804088 |
| 1 | -7.384549551  | -2.552125186 | -0.911527068 |
| 1 | -7.830403556  | -2.158306154 | 1.532742110  |
| 1 | -7.900393544  | -0.429006031 | 1.242876091  |
| 6 | -9.591351714  | -1.520017107 | 0.454311032  |
| 6 | -10.489899763 | -1.353740095 | 1.683298123  |
| 1 | -9.786566683  | -2.495153180 | -0.012411001 |
| 1 | -9.857564701  | -0.765880053 | -0.298891021 |
| 1 | -11.549050832 | -1.442337104 | 1.420544103  |
| 1 | -10.270462764 | -2.115140155 | 2.440389177  |
| 1 | -10.344652726 | -0.373453027 | 2.151430157  |
| 6 | 4.927068356   | -0.790486059 | 1.280314090  |
| 6 | 5.934217430   | -0.953240068 | 0.122864009  |
| 1 | 5.155781372   | -1.527440109 | 2.056167150  |
| 1 | 5.081340368   | 0.181715013  | 1.756952124  |
| 6 | 7.392280513   | -0.825744060 | 0.579523040  |
| 1 | 5.778695412   | -1.930554140 | -0.352317025 |
| 1 | 5.718967388   | -0.203328014 | -0.648965044 |
| 6 | 8.407282588   | -0.997166071 | -0.557156041 |
| 1 | 7.541031550   | 0.154807011  | 1.054441073  |
| 1 | 7.595007523   | -1.571962114 | 1.361505099  |
| 1 | 8.257637612   | -1.976820144 | -1.033024074 |
| 1 | 8.208994581   | -0.249332018 | -1.338155095 |
| 6 | 9.865898714   | -0.875576062 | -0.098968007 |
| 6 | 10.874717776  | -1.052121076 | -1.237656091 |
| 1 | 10.062077738  | -1.622032119 | 0.682843051  |
| 1 | 10.015521729  | 0.104247007  | 0.374722027  |
| 1 | 11.904940841  | -0.961528069 | -0.878353063 |
| 1 | 10.772226779  | -2.036420144 | -1.708539121 |
| 1 | 10.727516752  | -0.297311021 | -2.018500144 |
| 6 | 0.016540001   | 3.590005261  | -1.229073090 |
| 6 | -0.362135026  | 4.484413323  | -0.030597002 |
| 1 | -0.682780047  | 3.775027270  | -2.049032147 |
| 1 | 0.989966070   | 3.901661280  | -1.615465114 |
| 6 | -0.385703028  | 5.977091424  | -0.380559027 |
| 1 | -1.344884097  | 4.177304301  | 0.349983025  |
| 1 | 0.347768025   | 4.306198311  | 0.786991055  |
| 6 | -0.765737053  | 6.874866504  | 0.803238056  |
| 1 | 0.600843041   | 6.277658439  | -0.762065055 |
| 1 | -1.091760077  | 6.147424426  | -1.206314087 |
| 1 | -1.752788124  | 6.575627459  | 1.183706084  |
| 1 | -0.060256004  | 6.705042465  | 1.629021117  |

|   |              |              |              |
|---|--------------|--------------|--------------|
| 6 | -0.789038056 | 8.369010584  | 0.457843033  |
| 6 | -1.171088085 | 9.257912685  | 1.645138120  |
| 1 | -1.493610109 | 8.538237606  | -0.367868026 |
| 1 | 0.197840014  | 8.667827610  | 0.078896006  |
| 1 | -1.179673087 | 10.316798741 | 1.366983100  |
| 1 | -2.168004158 | 9.005574672  | 2.023975144  |
| 1 | -0.464165034 | 9.137626674  | 2.473898178  |

## 2.4 Coordinates of B3LYP/6-31G(d,p) optimized ground state molecular geometry of **Pr-4**

|   |              |              |              |
|---|--------------|--------------|--------------|
| 6 | 0.991597074  | 2.815447204  | -0.455424033 |
| 7 | -0.000158000 | 1.991131144  | -0.000142000 |
| 6 | -0.992222069 | 2.815159204  | 0.454987033  |
| 6 | -0.612968042 | 4.215006302  | 0.286784021  |
| 6 | 0.611814044  | 4.215185301  | -0.287477021 |
| 6 | 3.965307285  | -0.729648054 | -1.534921109 |
| 6 | 3.944499285  | 0.637708047  | -1.582767114 |
| 6 | 2.665788194  | 1.086063076  | -1.114909078 |
| 7 | 1.954203140  | -0.049652004 | -0.798254059 |
| 6 | 2.696543192  | -1.183564085 | -1.044461076 |
| 6 | -2.665813192 | 1.085312078  | 1.114779081  |
| 7 | -1.953934143 | -0.050212004 | 0.798119055  |
| 6 | -2.695947196 | -1.184328084 | 1.044402073  |
| 6 | -3.964794285 | -0.730749055 | 1.534958109  |
| 6 | -3.944357285 | 0.636615048  | 1.582769115  |
| 6 | -2.287162163 | -2.517379180 | 0.868238062  |
| 6 | -1.020764075 | -2.914966208 | 0.386156028  |
| 7 | 0.000404000  | -2.090699151 | -0.000083000 |
| 6 | 1.021791075  | -2.914679209 | -0.386369028 |
| 6 | 0.633522044  | -4.314083311 | -0.238841017 |
| 6 | -0.632147045 | -4.314262311 | 0.238515017  |
| 6 | 2.234299161  | 2.418022172  | -0.994047069 |
| 6 | 2.288108163  | -2.516733182 | -0.868359064 |
| 6 | -2.234743161 | 2.417395171  | 0.993765070  |
| 1 | 1.004494070  | -0.051774004 | -0.442582032 |
| 1 | -1.004229074 | -0.052107004 | 0.442437032  |
| 1 | -1.200703088 | 5.080648368  | 0.554840038  |
| 1 | 1.199197087  | 5.081005367  | -0.555726040 |
| 1 | 4.791383346  | -1.364828100 | -1.814332131 |
| 1 | 4.751105342  | 1.278104093  | -1.904356135 |
| 1 | -4.790676344 | -1.366144100 | 1.814455133  |
| 1 | -4.751114344 | 1.276799094  | 1.904394135  |
| 1 | 1.238075088  | -5.180687374 | -0.462150033 |
| 1 | -1.236495087 | -5.181029371 | 0.461752033  |
| 6 | 3.212596232  | 3.499723251  | -1.431686105 |
| 6 | 4.140384298  | 4.003509290  | -0.306680022 |
| 1 | 2.658292192  | 4.347061315  | -1.844151131 |
| 1 | 3.824241273  | 3.132037224  | -2.260711164 |
| 6 | 5.093498369  | 5.109884369  | -0.773479054 |
| 1 | 3.527073253  | 4.369193317  | 0.526612038  |
| 1 | 4.716923339  | 3.157724229  | 0.089883006  |
| 6 | 6.027050413  | 5.622042383  | 0.330341024  |

|   |              |              |              |
|---|--------------|--------------|--------------|
| 1 | 5.696429411  | 4.741290343  | -1.616128115 |
| 1 | 4.505958325  | 5.950604409  | -1.169949084 |
| 1 | 5.425102402  | 5.983072450  | 1.176436083  |
| 1 | 6.623624470  | 4.784948344  | 0.720103051  |
| 6 | 6.967862526  | 6.740636461  | -0.133907010 |
| 6 | 7.897492594  | 7.247144498  | 0.972957069  |
| 1 | 6.370508461  | 7.576961521  | -0.521790038 |
| 1 | 7.568561520  | 6.380352481  | -0.980216069 |
| 1 | 8.554385608  | 8.045033561  | 0.611574041  |
| 1 | 7.325670538  | 7.644958575  | 1.819058128  |
| 1 | 8.533503639  | 6.440970476  | 1.355912098  |
| 6 | -3.314195237 | -3.597433258 | 1.179360084  |
| 6 | -4.159737299 | -4.007347290 | -0.044120003 |
| 1 | -3.980539287 | -3.261909233 | 1.978747142  |
| 1 | -2.812884202 | -4.481218320 | 1.582276112  |
| 6 | -5.190621375 | -5.097931366 | 0.269848019  |
| 1 | -4.669674336 | -3.118960223 | -0.438977032 |
| 1 | -3.488581249 | -4.350494315 | -0.841757059 |
| 6 | -6.038640453 | -5.498203371 | -0.943542069 |
| 1 | -4.674814335 | -5.986577455 | 0.661499047  |
| 1 | -5.852784407 | -4.753915342 | 1.077722078  |
| 1 | -6.555449454 | -4.609561329 | -1.333166097 |
| 1 | -5.376693373 | -5.840130403 | -1.751915124 |
| 6 | -7.071223490 | -6.590754467 | -0.640120048 |
| 6 | -7.915407573 | -6.980077524 | -1.857282136 |
| 1 | -7.731544567 | -6.249838427 | 0.169066012  |
| 1 | -6.554316485 | -7.479801561 | -0.253855018 |
| 1 | -8.643725598 | -7.758361577 | -1.607295115 |
| 1 | -8.469755614 | -6.118681423 | -2.246870163 |
| 1 | -7.287144530 | -7.361682532 | -2.670126193 |
| 6 | 3.315460240  | -3.596483258 | -1.179465083 |
| 6 | 4.160801300  | -4.006482287 | 0.044125003  |
| 1 | 3.981918286  | -3.260629233 | -1.978621140 |
| 1 | 2.814462204  | -4.480301325 | -1.582693114 |
| 6 | 5.191850374  | -5.096922368 | -0.269803020 |
| 1 | 4.670593336  | -3.118108226 | 0.439199032  |
| 1 | 3.489520253  | -4.349795314 | 0.841586060  |
| 6 | 6.039640439  | -5.497331392 | 0.943704067  |
| 1 | 4.676218337  | -5.985545454 | -0.661736049 |
| 1 | 5.854165401  | -4.752695340 | -1.077462078 |
| 1 | 6.556330481  | -4.608721329 | 1.333560096  |
| 1 | 5.377546407  | -5.839404425 | 1.751893126  |
| 6 | 7.072344499  | -6.589779458 | 0.640327046  |

|   |              |              |              |
|---|--------------|--------------|--------------|
| 6 | 7.916394594  | -6.979146490 | 1.857568135  |
| 1 | 7.732751567  | -6.248733452 | -0.168736012 |
| 1 | 6.555562486  | -7.478830521 | 0.253905018  |
| 1 | 8.644712619  | -7.757450545 | 1.607645118  |
| 1 | 8.470731628  | -6.117773460 | 2.247222161  |
| 1 | 7.288038522  | -7.360741549 | 2.670345193  |
| 6 | -3.213294232 | 3.498836249  | 1.431473101  |
| 6 | -4.141466296 | 4.002268290  | 0.306628022  |
| 1 | -2.659162191 | 4.346377311  | 1.843755132  |
| 1 | -3.824664276 | 3.131040228  | 2.260653161  |
| 6 | -5.094838367 | 5.108349368  | 0.773610057  |
| 1 | -3.528458253 | 4.368123315  | -0.526813038 |
| 1 | -4.717823337 | 3.156287227  | -0.089779007 |
| 6 | -6.028683454 | 5.620321393  | -0.330046024 |
| 1 | -5.697553436 | 4.739521340  | 1.616311115  |
| 1 | -4.507485324 | 5.949207434  | 1.170066085  |
| 1 | -5.426957380 | 5.981568422  | -1.176205087 |
| 1 | -6.625096483 | 4.783097346  | -0.719775051 |
| 6 | -6.969728511 | 6.738632467  | 0.134423010  |
| 6 | -7.899737576 | 7.244891525  | -0.972235071 |
| 1 | -6.372539444 | 7.575120566  | 0.522209038  |
| 1 | -7.570142543 | 6.378139462  | 0.980845070  |
| 1 | -8.556620641 | 8.042748574  | -0.610767046 |
| 1 | -7.328202546 | 7.642663533  | -1.818550129 |
| 1 | -8.535763596 | 6.438594470  | -1.354907095 |



### 3. Calculated orbital energies and splittings.

Table S1. Calculated orbital energies and splittings (in eV). Three digits after the decimal point are used in cases when the splitting is too small to be analyzed with only two digits.

|                           | HOMO-1 | HOMO  | LUMO   | LUMO+1 | $\Delta$ HOMO | $\Delta$ LUMO | $ \Delta$ HOMO - $\Delta$ LUMO |
|---------------------------|--------|-------|--------|--------|---------------|---------------|--------------------------------|
| <b>B3LYP</b>              |        |       |        |        |               |               |                                |
| Pr                        | -5.30  | -5.16 | -2.246 | -2.230 | 0.14          | 0.016         | 0.124                          |
| Pr-1                      | -5.26  | -5.04 | -2.208 | -2.187 | 0.22          | 0.021         | 0.199                          |
| Pr-2a                     | -5.22  | -4.93 | -2.173 | -2.145 | 0.29          | 0.028         | 0.262                          |
| Pr-2b                     | -5.22  | -4.94 | -2.170 | -2.158 | 0.28          | 0.012         | 0.268                          |
| Pr-3                      | -5.18  | -4.83 | -2.140 | -2.123 | 0.35          | 0.017         | 0.333                          |
| Pr-4                      | -5.15  | -4.74 | -2.117 | -2.092 | 0.41          | 0.025         | 0.385                          |
|                           |        |       |        |        |               |               |                                |
| <b>BP86-D</b>             |        |       |        |        |               |               |                                |
| Pr                        | -5.81  | -5.57 | -3.611 | -3.593 | 0.24          | 0.018         | 0.222                          |
| Pr-1                      | -5.74  | -5.43 | -3.540 | -3.532 | 0.31          | 0.008         | 0.302                          |
| Pr-2a                     | -5.68  | -5.29 | -3.471 | -3.462 | 0.39          | 0.009         | 0.381                          |
| Pr-2b                     | -5.67  | -5.30 | -3.486 | -3.466 | 0.37          | 0.020         | 0.350                          |
| Pr-3                      | -5.61  | -5.17 | -3.423 | -3.406 | 0.44          | 0.017         | 0.423                          |
| Pr-4                      | -5.55  | -5.06 | -3.389 | -3.353 | 0.49          | 0.036         | 0.454                          |
|                           |        |       |        |        |               |               |                                |
| <b>INDO/S<sup>a</sup></b> |        |       |        |        |               |               |                                |
| Pr                        | -6.96  | -6.72 | -1.727 | -1.714 | 0.24          | 0.013         | 0.227                          |
| Pr-1                      | -6.84  | -6.71 | -1.704 | -1.659 | 0.13          | 0.045         | 0.085                          |
| Pr-2a                     | -6.74  | -6.68 | -1.695 | -1.608 | 0.06          | 0.087         | -0.027                         |
| Pr-2b                     | -6.72  | -6.71 | -1.673 | -1.615 | 0.014         | 0.058         | -0.044                         |
| Pr-3                      | -6.70  | -6.60 | -1.66  | -1.578 | 0.10          | 0.082         | 0.019                          |
| Pr-4                      | -6.69  | -6.50 | -1.643 | -1.547 | 0.19          | 0.096         | 0.094                          |

<sup>a</sup> B3LYP-optimized geometry

#### 4. Comparison of main configurations calculated for the $S_1 \leftarrow S_0$ transition.

Table S2. Dominant configurations in the  $S_1 \leftarrow S_0$  transition ( $Q_x$  band).

|              | B3LYP/6-31G(d,p)      | BP86-D/DZP            | INDO/S              |
|--------------|-----------------------|-----------------------|---------------------|
| <b>Pr</b>    | 58% (HOMO – LUMO+1)   | 62% (HOMO – LUMO+1)   | 99% (HOMO-1 – LUMO) |
|              | 41% (HOMO-1 – LUMO)   | 37% (HOMO-1 – LUMO)   |                     |
| <b>Pr-1</b>  | 42% (HOMO – LUMO+1)   | 50% (HOMO – LUMO+1)   | 85% (HOMO-1 – LUMO) |
|              | 30% (HOMO-1 – LUMO)   | 26% (HOMO-1 – LUMO)   |                     |
| <b>Pr-2a</b> | 64% (HOMO – LUMO+1)   | 60% (HOMO – LUMO)     | 94% (HOMO – LUMO)   |
|              | 36% (HOMO-1 – LUMO)   | 26% (HOMO-1 – LUMO+1) |                     |
| <b>Pr-2b</b> | 64% (HOMO – LUMO)     | 68% (HOMO – LUMO+1)   | 94% (HOMO – LUMO+1) |
|              | 35% (HOMO-1 – LUMO+1) | 31% (HOMO-1 – LUMO)   |                     |
| <b>Pr-3</b>  | 59% (HOMO – LUMO)     | 71% (HOMO – LUMO)     | 100% (HOMO – LUMO)  |
|              | 30% (HOMO-1 – LUMO+1) | 28% (HOMO-1 – LUMO+1) |                     |
| <b>Pr-4</b>  | 70% (HOMO – LUMO)     | 74% (HOMO – LUMO)     | 100% (HOMO – LUMO)  |
|              | 30% (HOMO-1 – LUMO+1) | 25% (HOMO-1 – LUMO+1) |                     |

#### 5. Rates of radiative and nonradiative $S_1$ depopulation.

Table S3. Rates of radiative and nonradiative  $S_1$  depopulation (estimated accuracy:  $\pm 20\%$ ).

|              | $k_r$ [ $10^6$ s $^{-1}$ ] | $k_{nr}$ [ $10^8$ s $^{-1}$ ] |
|--------------|----------------------------|-------------------------------|
| <b>Pr</b>    | 3.4                        | 1.2                           |
|              | 4.0                        | 0.9                           |
| <b>Pr-1</b>  | 2.7                        | 1.2                           |
| <b>Pr-2a</b> | 3.2                        | 1.3                           |
| <b>Pr-2b</b> | 3.5                        | 1.2                           |
| <b>Pr-3</b>  | 4.5                        | 1.2                           |
| <b>Pr-4</b>  | 5.2                        | 1.2                           |

## 6. Figures

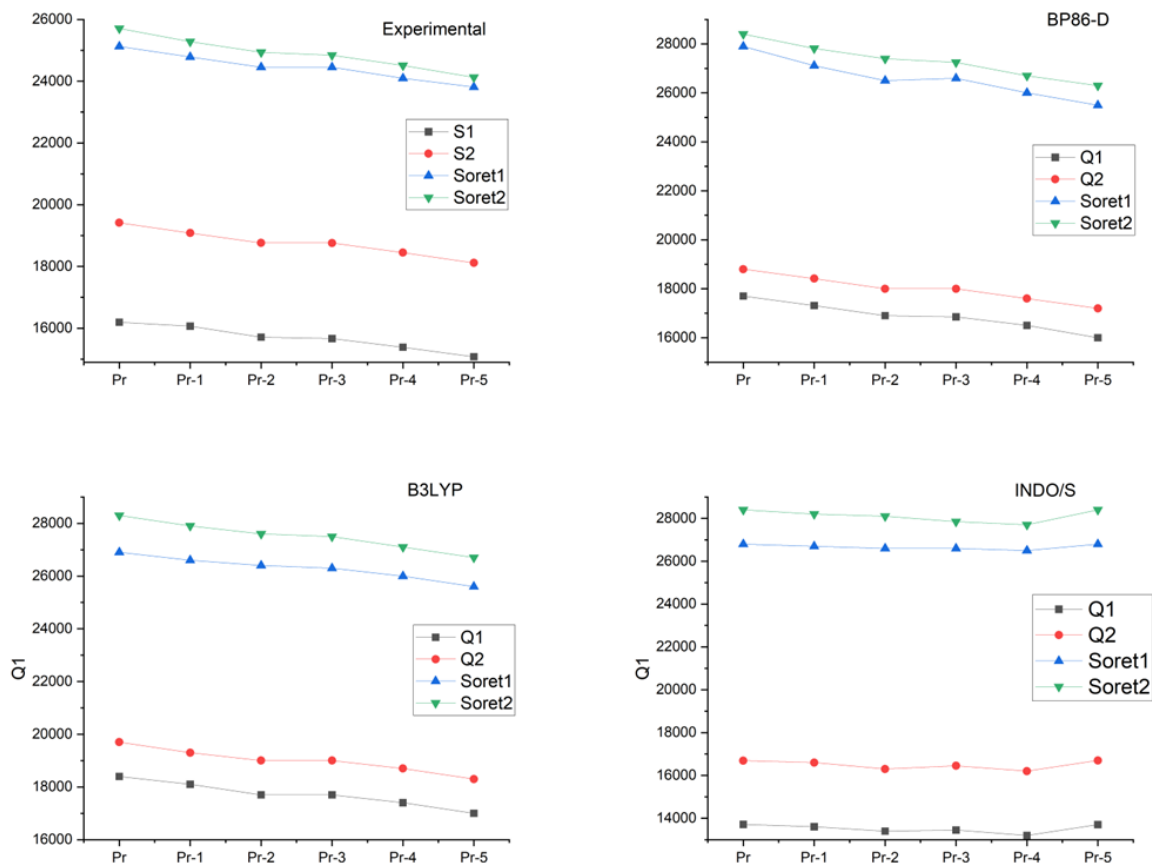

Figure S1. Experimental (absorption in *n*-hexane at 293 K) and calculated energies for Q and Soret transitions. The data for **Pr-2** correspond to **Pr-2a**. The values obtained for **Pr-2b** are practically the same.

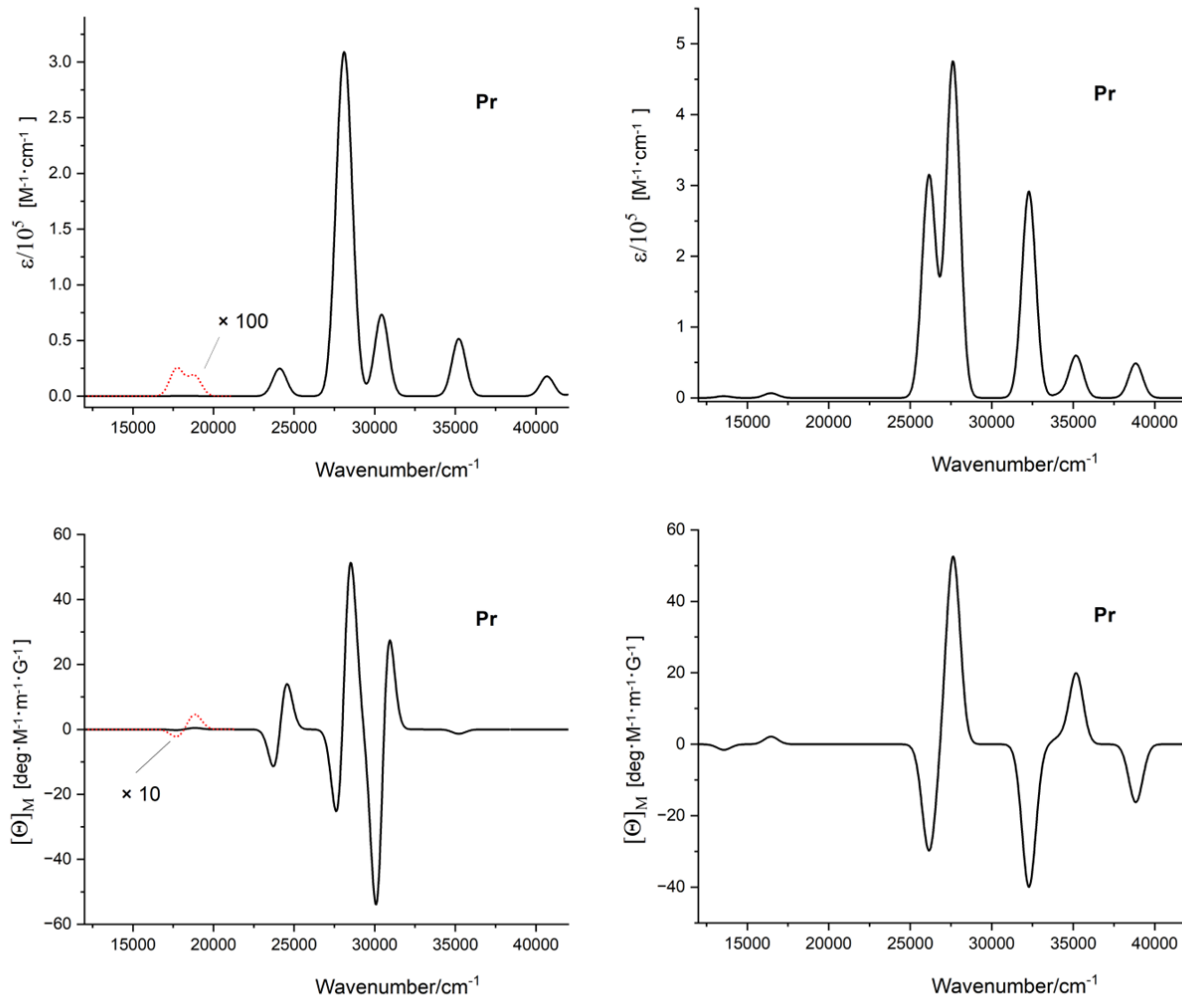

Figure S2. Simulated absorption and MCD spectra of **Pr**. Left, BP86-D, right, INDO/S calculations.

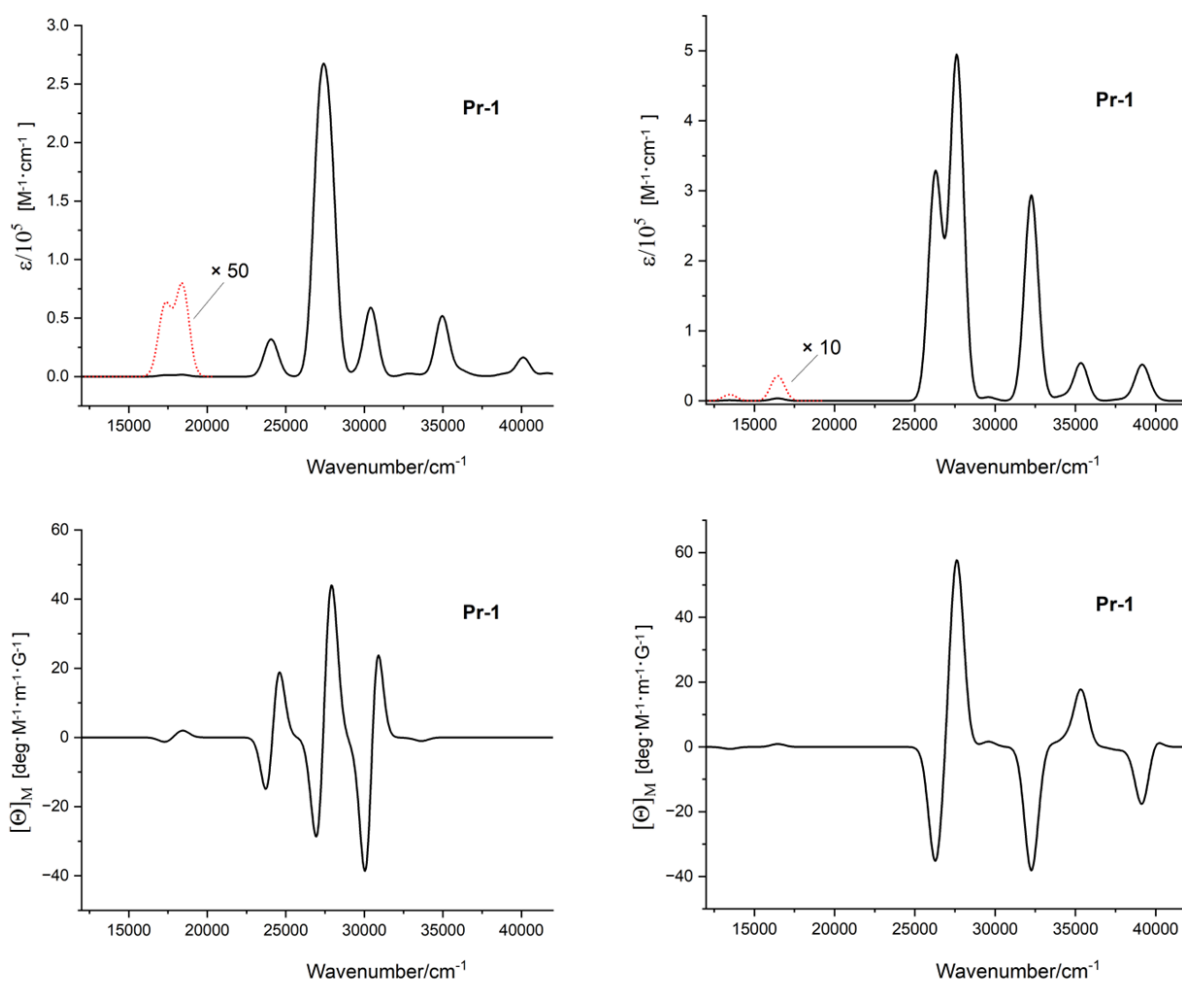

Figure S3. Simulated absorption and MCD spectra of **Pr-1**. Left, BP86-D, right, INDO/S calculations.

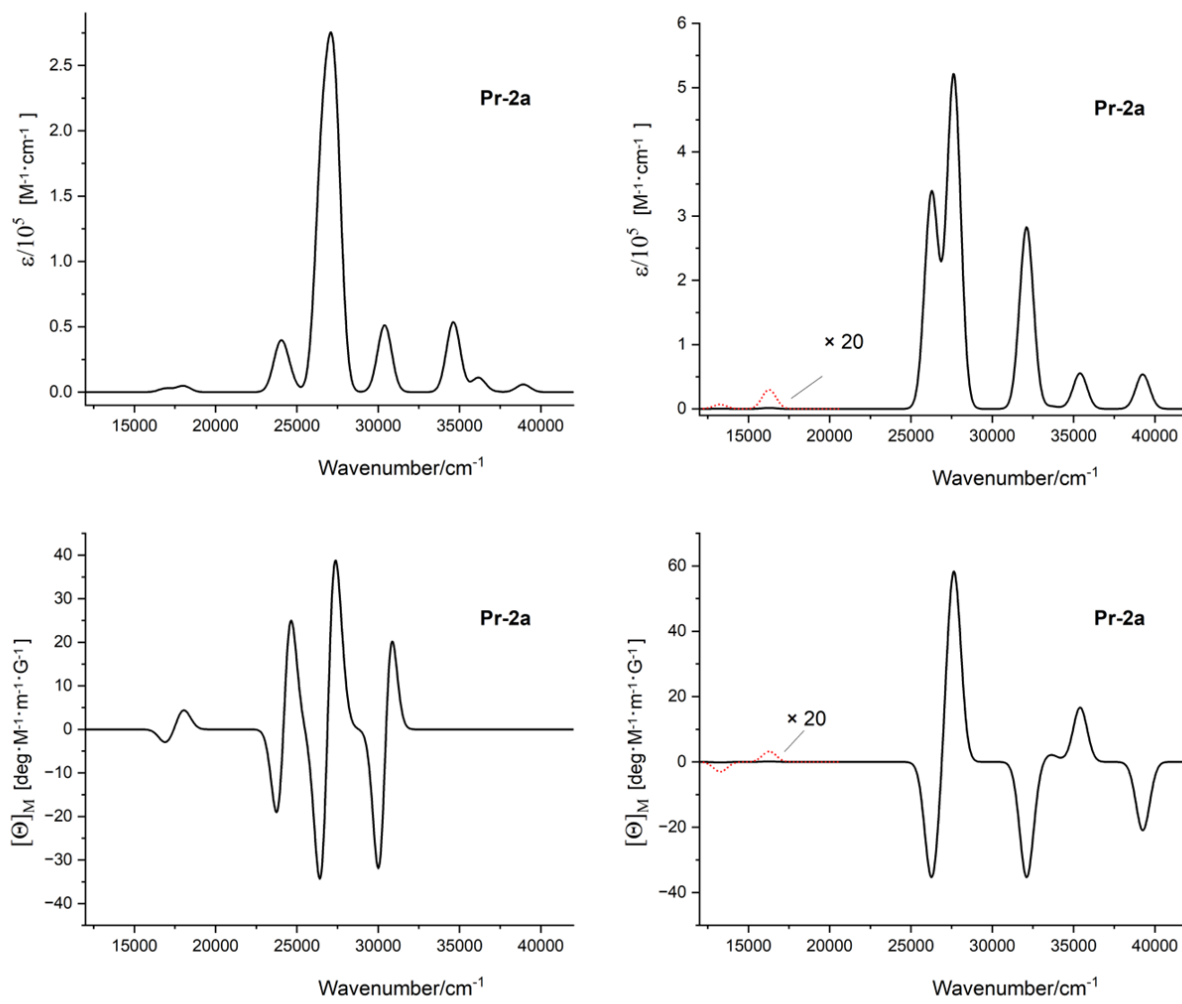

Figure S4. Simulated absorption and MCD spectra of **Pr-2a**. Left, BP86-D, right, INDO/S calculations.

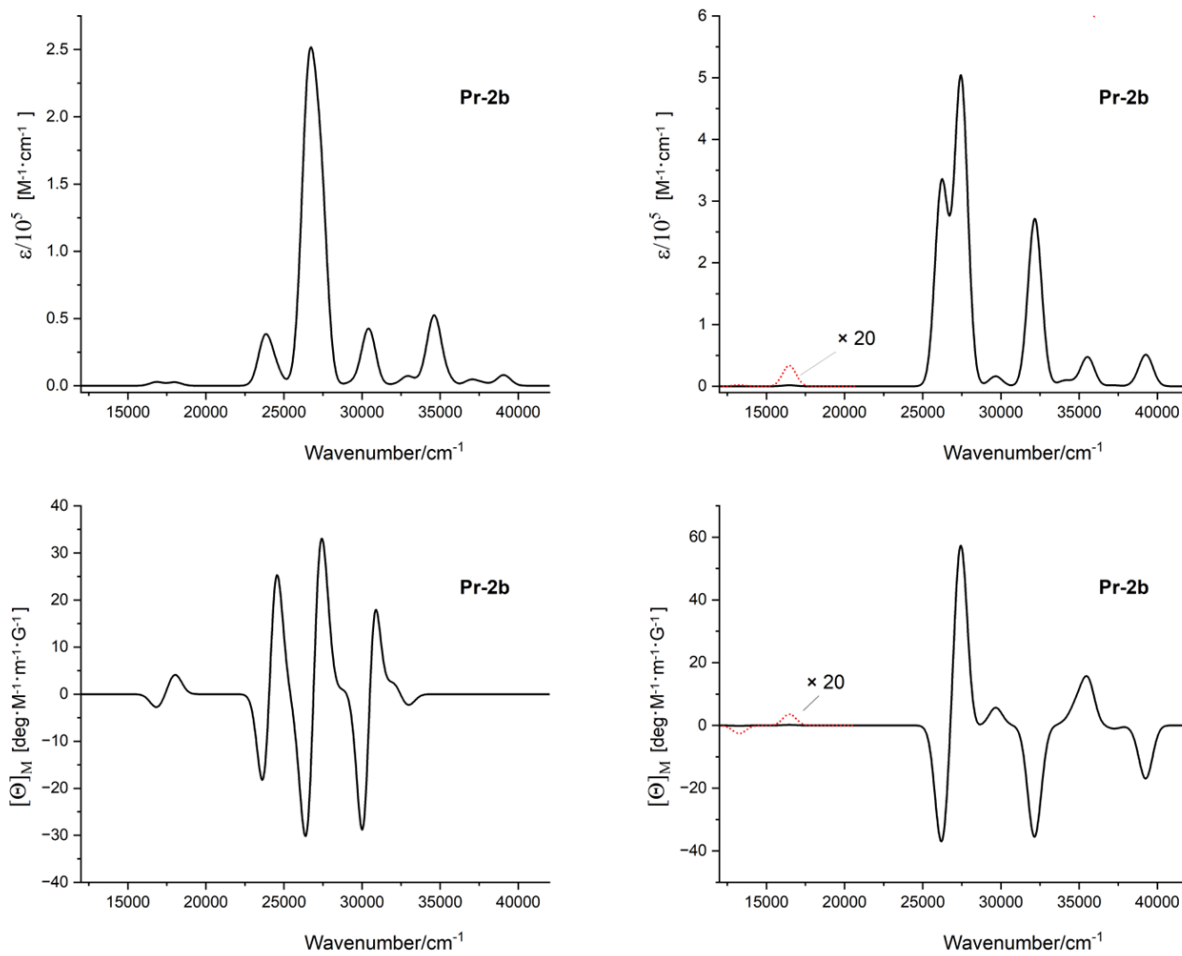

Figure S5. Simulated absorption and MCD spectra of **Pr-2b**. Left, BP86-D, right, INDO/S calculations.

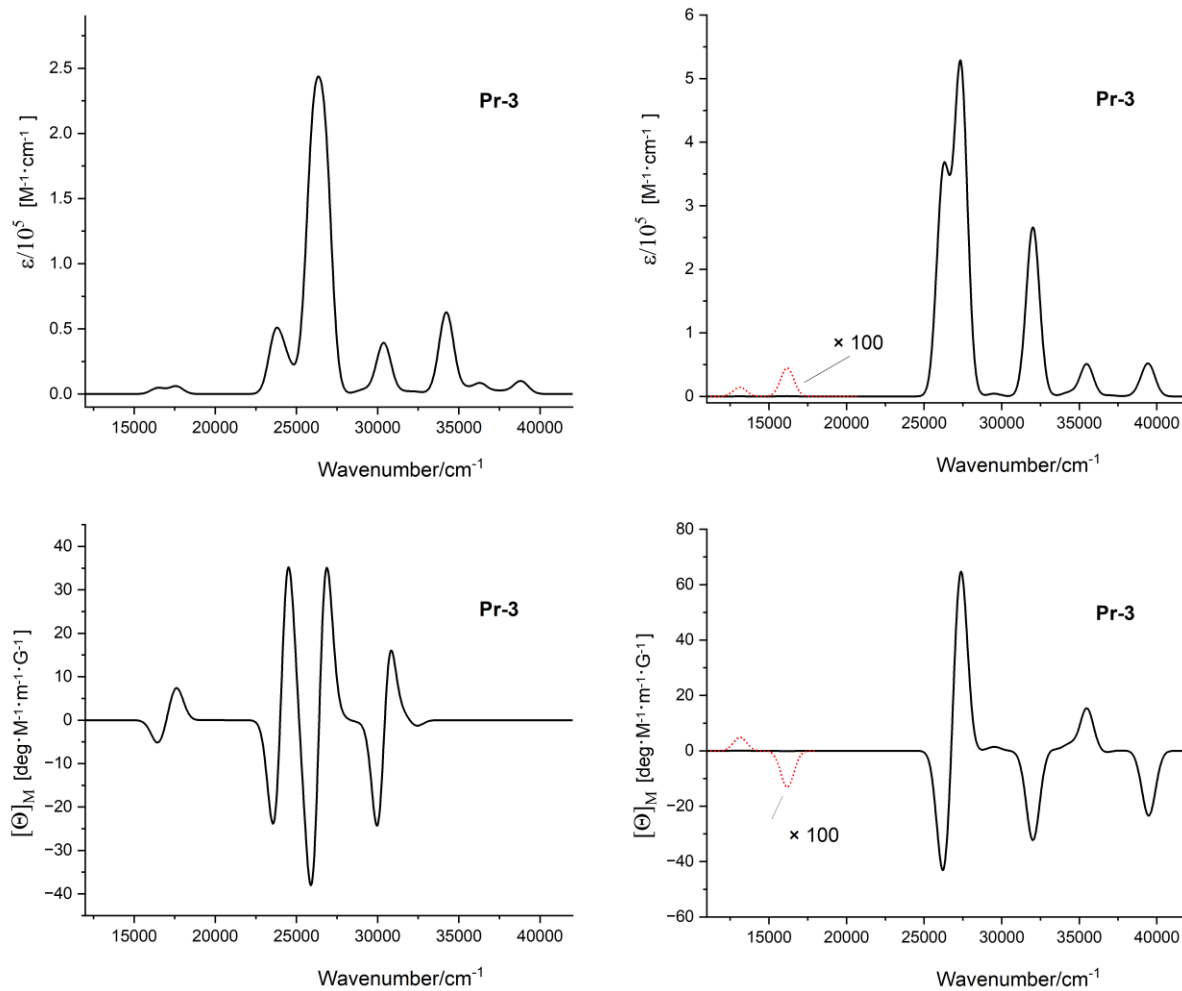

Figure S6. Simulated absorption and MCD spectra of **Pr-3**. Left, BP86-D, right, INDO/S calculations.



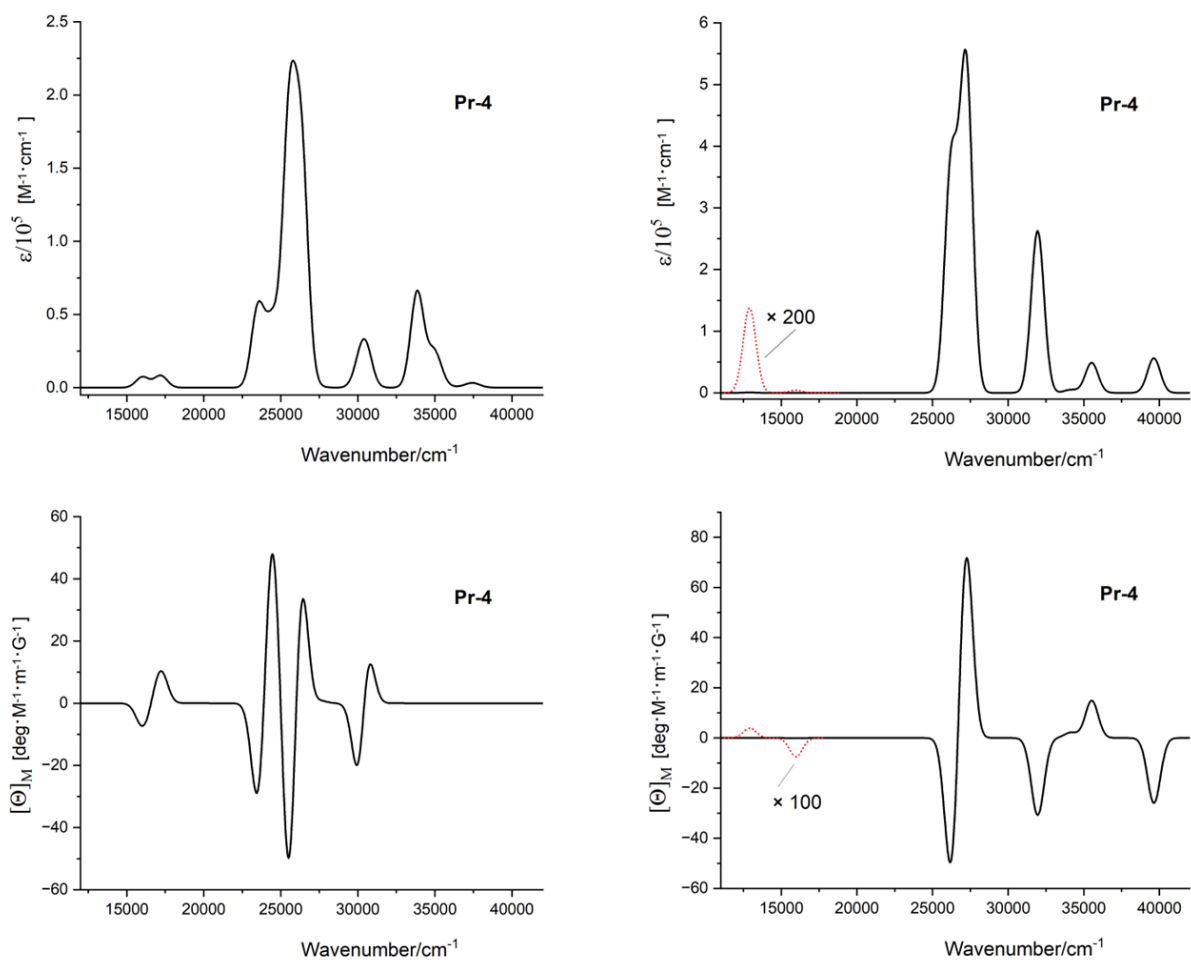

Figure S7. Simulated absorption and MCD spectra of **Pr-4**. Left, BP86-D, right, INDO/S calculations.

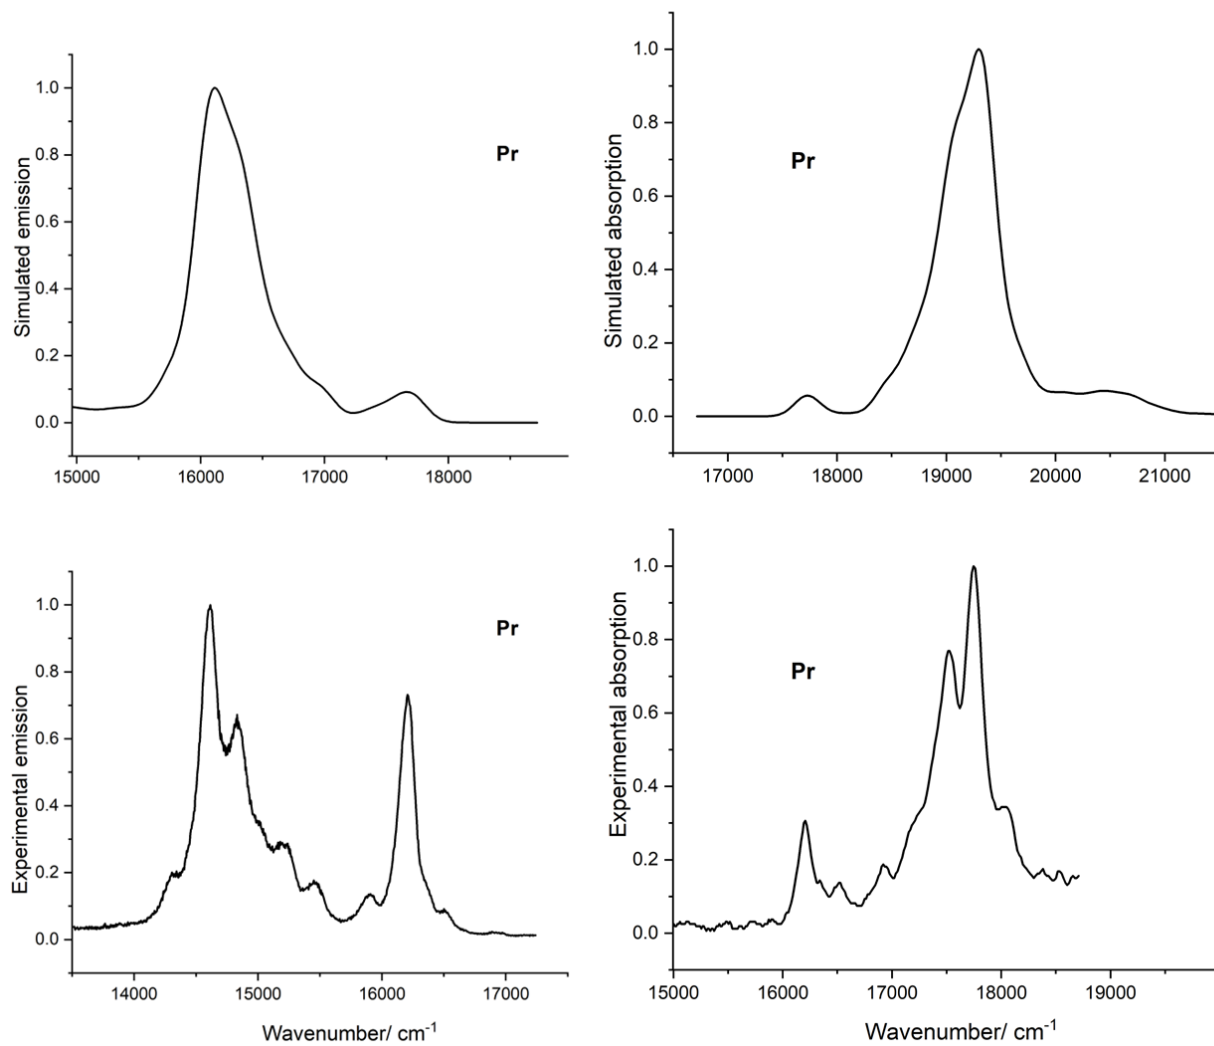

Figure S8. Comparison of simulated (top) and experimental (bottom) absorption and emission spectra of **Pr**. The simulated spectra contain both FC and HT contributions.

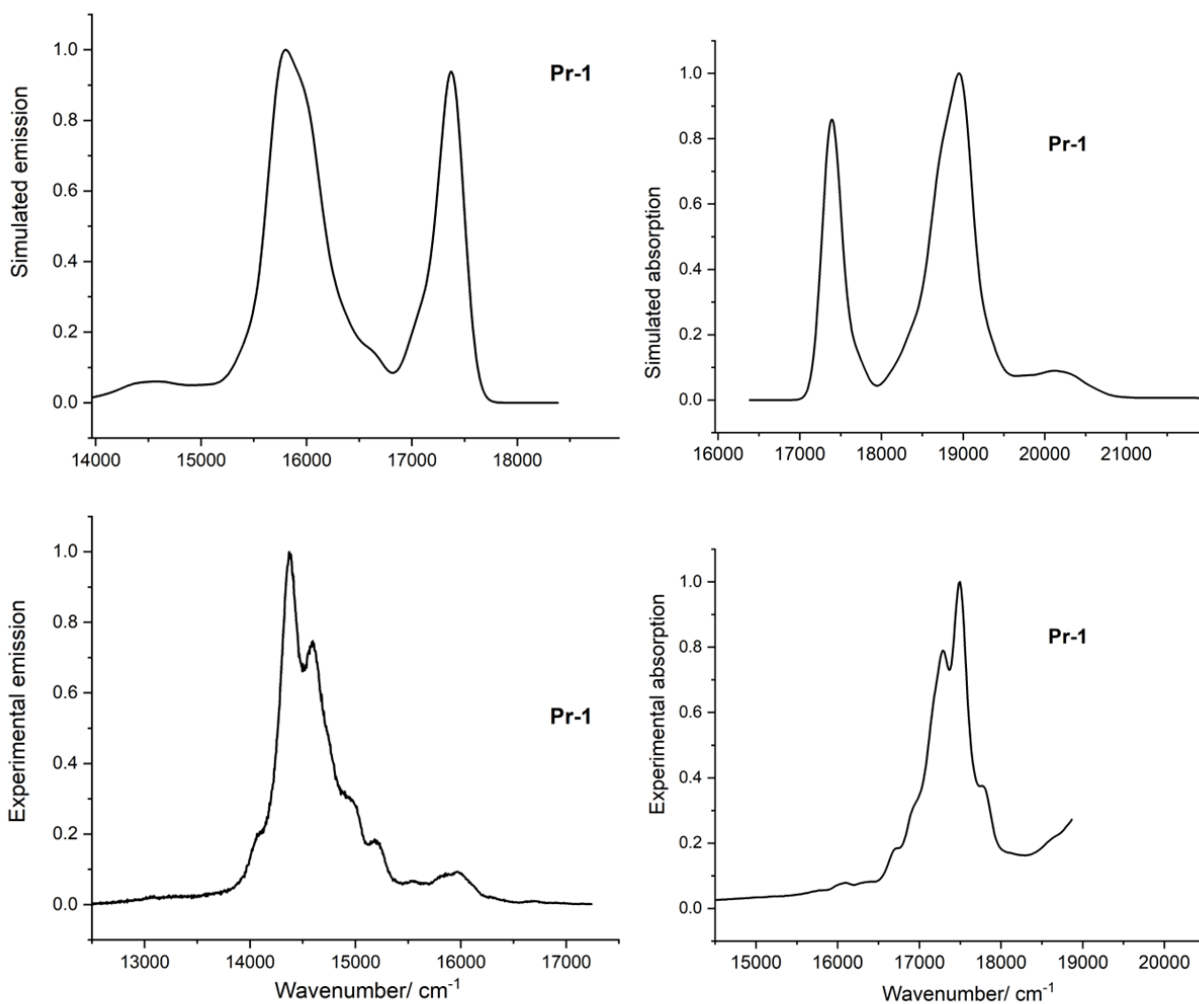

Figure S9. Comparison of simulated (top) and experimental (bottom) absorption and emission spectra of **Pr-1**. The simulated spectra contain both FC and HT contributions.

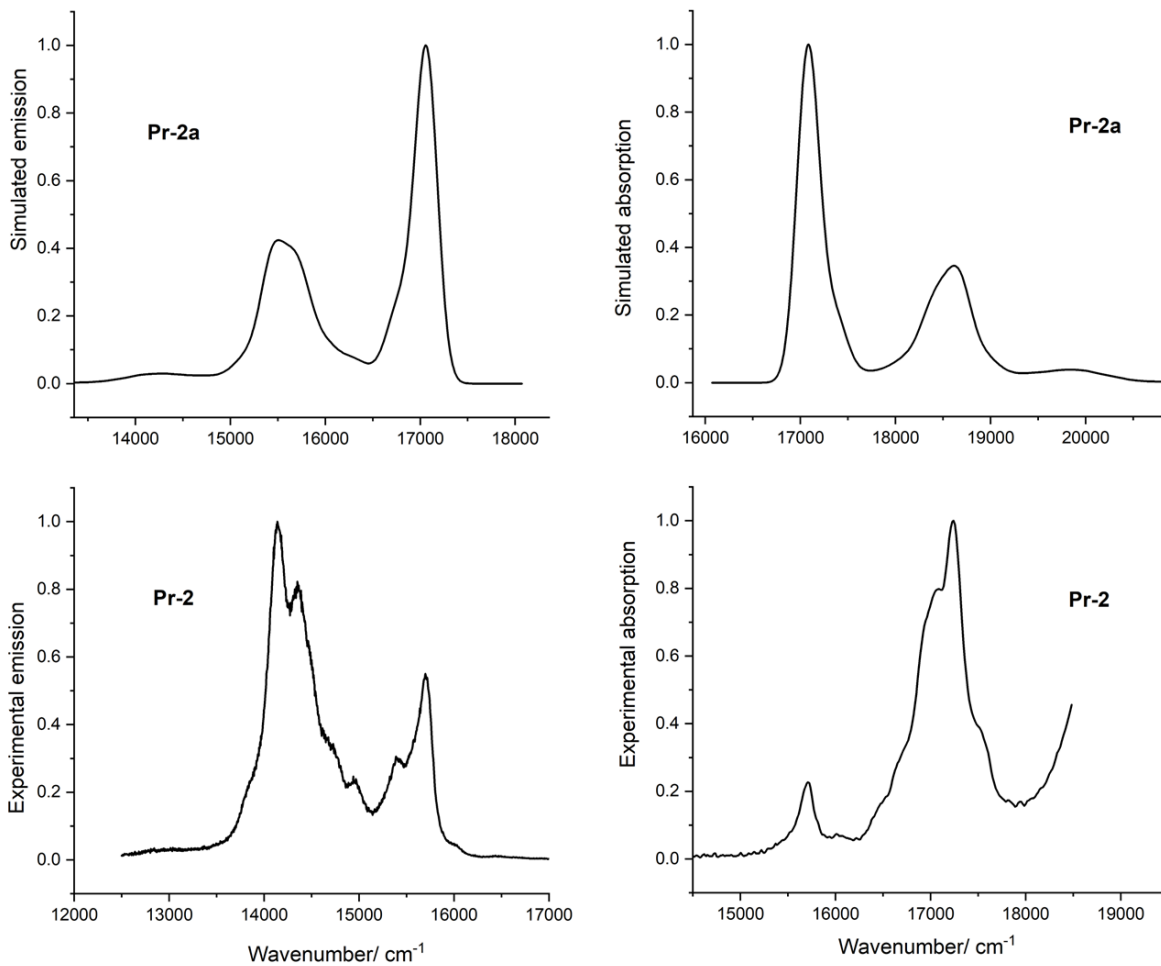

Figure S10. Comparison of simulated (top) and experimental (bottom) absorption and emission spectra of **Pr-2a**. The simulated spectra contain both FC and HT contributions.

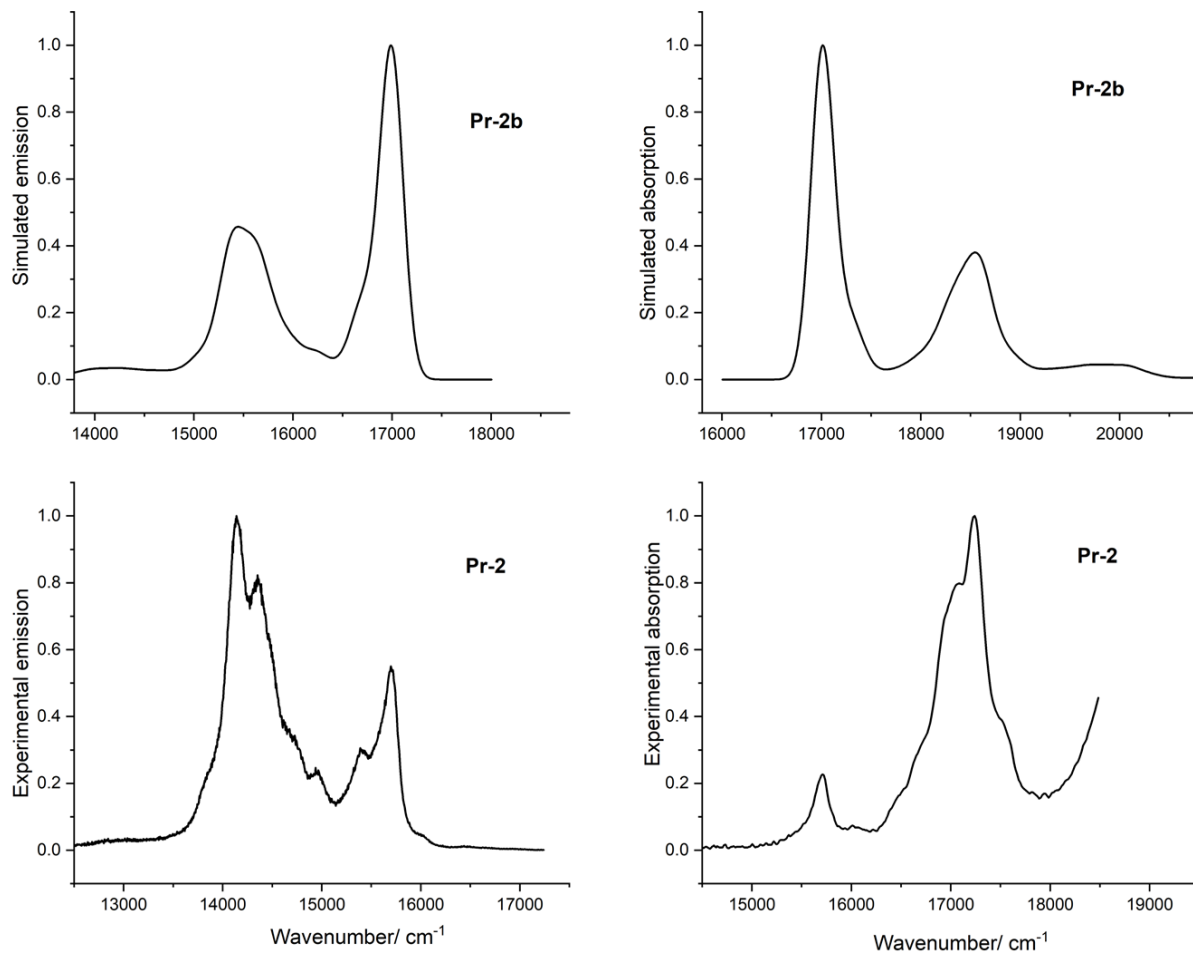

Figure S11. Comparison of simulated (top) and experimental (bottom) absorption and emission spectra of **Pr-2b**. The simulated spectra contain both FC and HT contributions.

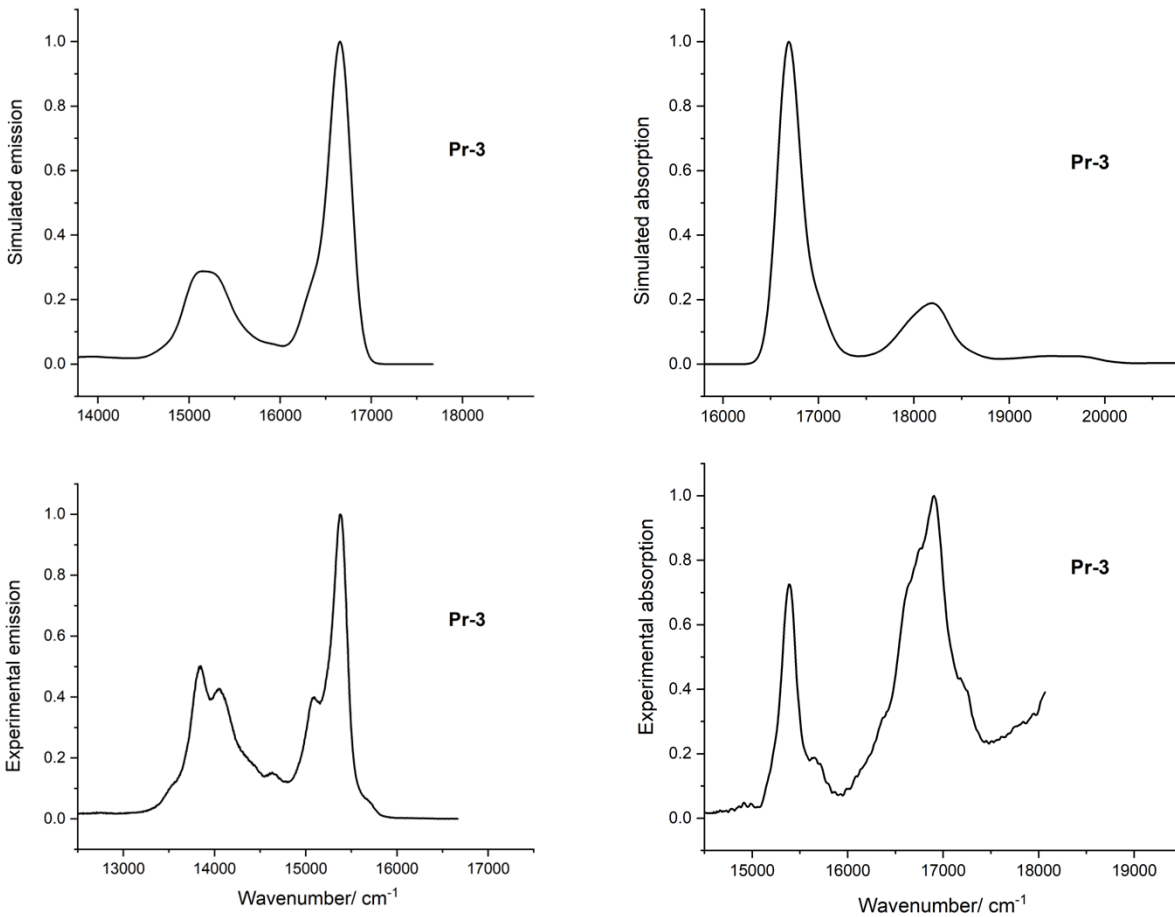

Figure S12. Comparison of simulated (top) and experimental (bottom) absorption and emission spectra of **Pr-3**. The simulated spectra contain both FC and HT contributions.

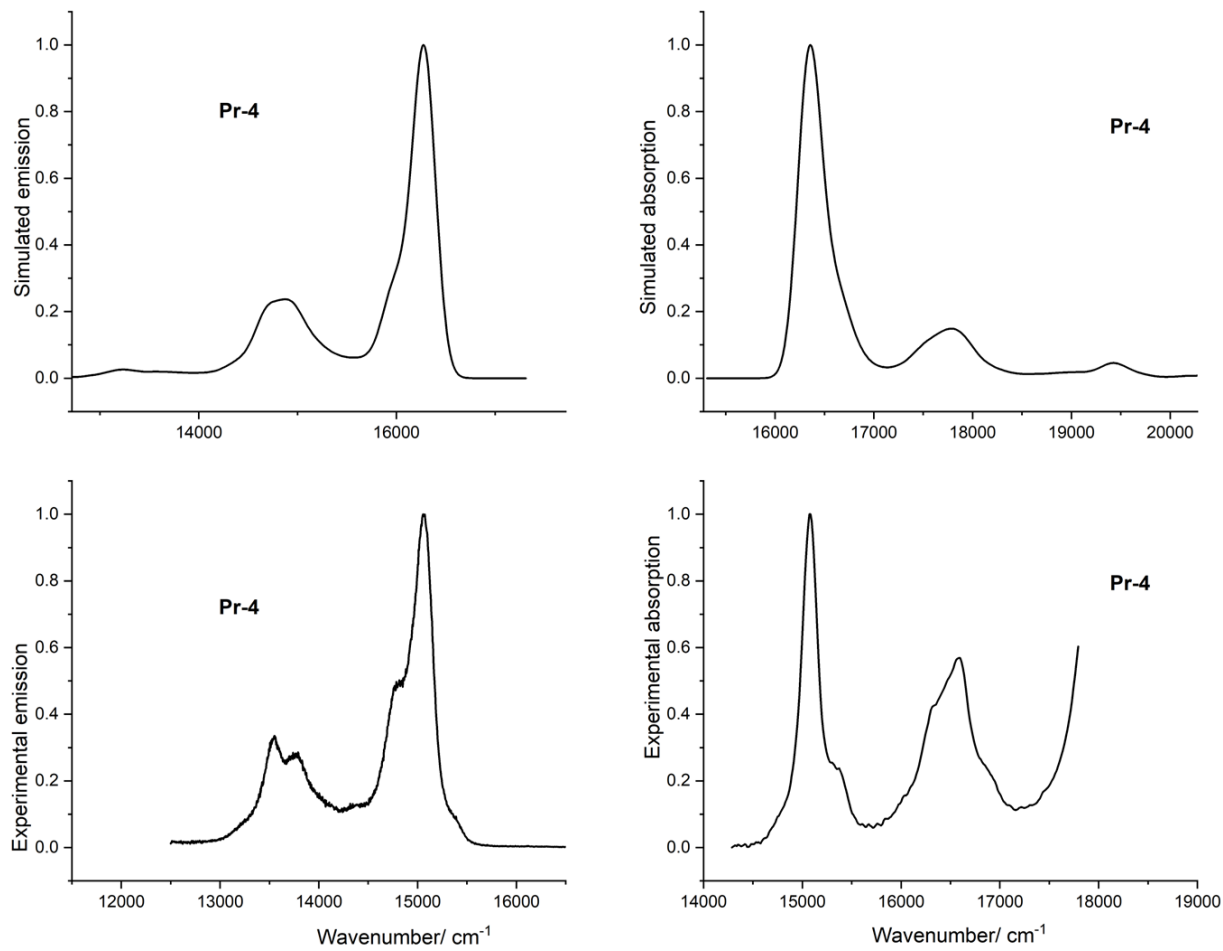

Figure S13. Comparison of simulated (top) and experimental (bottom) absorption and emission spectra of **Pr-4**. The simulated spectra contain both FC and HT contributions.
